# Supplementary material for: A Sustainable Cellulose-Based Hydrogel for the Reinforcement of Deteriorated Wood in Heritage Conservation
Source: Research Square preprint supplement (doi:10.21203/rs.3.rs-6723812/v1), 2025-05-29
Supplement: Supplementary file 1 [file 8c419e5bd39b761047f56fb6.docx]

**Table** **S1** Correspondence between ∆E value and color change

| NO. | Colour Change | ∆E |
| --- | --- | --- |
| 1 | trace | 0-0.5 |
| 2 | minimal | 0.5-1.5 |
| 3 | detect | 1.5-3.0 |
| 4 | visible | 3.0-6.0 |
| 5 | great | 6.0-12.0 |
| 6 | completely different | >12.0 |

**Table** **S2** Solubility and acid-base screening results

| NO. | Name | Stickiness | Grain Size | Solubility | | pH | Remark |
| --- | --- | --- | --- | --- | --- | --- | --- |
| H2O | C2H5OH |
| 1 | Cellulose | 180～220 mPa.s | 25 μm | × | × |  |  |
| 2 | Cyanoethyl cellulose |  |  | × | × |  |  |
| 3 | microcrystalline cellulose |  | 40-60 μm | × | × |  |  |
| 4 | Methyl cellulose | 400 mPa.s |  | √ | × | neutral |  |
| 5 | Hydroxyethyl cellulose | 250～450 mPa.s |  | √ | × | neutral | The aqueous solution is greyish white |
| 6 | Cellulose acetate butyrate |  |  | × | × |  | Butyryl content：50～54% |
| 7 | Highly substituted hydroxypropyl cellulose |  |  | √ | √ | neutral |  |
| 8 | Polyanionic cellulose |  |  | √ | × | neutral |  |
| 9 | carboxymethylcellulose |  |  | √ | × | neutral |  |
| 10 | Ethyl cellulose | 180～220 mPa.s |  | × | √ | neutral | 5%Toluene/isopropanol 80:20 |
| 11 | Carboxycellulose nanofibres |  |  | √ | × | neutral | calibre：4～10nm，length：200 nm |
| 12 | Carboxycellulose nanofibres |  |  | √ | × | neutral | calibre：50 nm，length：1～3μm |
| 13 | Carboxymethyl chitosan |  |  | √ | × | 8～9 |  |
| 14 | Cellulose acetate |  |  | × | × |  |  |

**Table** **S3** Mechanical properties of single components

| NO. | Name | Maximum Force（N） | Tensile Strength（N/mm2） | Remark |
| --- | --- | --- | --- | --- |
| 1 | Polyanionic cellulose | 13.562 | 9.0413 | reserve |
| 2 | Carboxycellulose nanofibres（calibre：4～10nm，length：200 nm） | 10.872 | 8.0533 | reserve |
| 3 | Carboxymethyl chitosan | 26.565 | 11.55 | reserve |
| 4 | Methyl cellulose | 54.9560 | 62.8068 | High viscosity, brittle film, high hardness, high measurement error. |
| 5 | Highly substituted hydroxypropyl cellulose |  | | High viscosity, air bubbles in the solution can not be discharged, resulting in slow film formation, the film surface is not smooth, can not be accurately measured |
| 6 | Carboxymethyl cellulose |  | | High viscosity, slow drying, uneven film formation, non-smooth film surface, unable to measure accurately |
| 7 | Carboxycellulose nanofibres（calibre：50 nm，length：1～3μm） |  | | High viscosity, uneven film formation, not measurable |

**Table S4** Relationship between different concentrations of carboxylated cellulose nanofibres (diameter: 4-10 nm, length 200 nm), polyanionic cellulose and carboxymethyl chitosan and maximum force, tensile strength

| NO. | Name of material | Concentration（%） | Maximum force（N） | Tensile strength（N/mm2） |
| --- | --- | --- | --- | --- |
| 1 | Carboxycellulose nanofibres（calibre：4～10nm，length：200 nm） | 1 | 9.114 | 8.68 |
| 2 | 2 | 9.994 | 9.7048 |
| 3 | 3 | 10.872 | 8.0533 |
| 4 | 4 | 17.306 | 12.1566 |
| 5 | 5 | 21.7645 | 17.854 |
| 6 | 6 | 16.2897 | 18.7426 |
| 7 | Polyanionic cellulose | 1 | 7.966 | 8.8511 |
| 8 | 2 | 7.38 | 10 |
| 9 | 3 | 13.562 | 9.0413 |
| 10 | 4 | 26.244 | 17.496 |
| 11 | 5 | 47.82 | 23.91 |
| 12 | 6 | 41.686 | 26.8942 |
| 13 | Carboxymethyl chitosan | 1 | 2.224 | 3.8678 |
| 14 | 2 | 2.276 | 7.92 |
| 15 | 3 | 26.565 | 11.55 |
| 16 | 4 | 23.85 | 27.2511 |
| 17 | 5 | 21.722 | 23.4832 |
| 18 | 6 | 9.456 | 8.5964 |

**Table S5** Screening results of alternative osmotic enhancers

| NO. | Alternative material | Additive quantity | Experimental Result |
| --- | --- | --- | --- |
| 1 | Twain 85 | Prepare a 10% aqueous solution and mix in equal volume with the reinforcing agent. | Reinforcement changes from clear to milky white |
| 2 | polyethylene glycol 200、400、600、2000 | Prepare a 10 % aqueous solution and mix in equal volume with the reinforcing agent. | Darkening of wood samples after reinforcement with polyethylene glycol 200, 400, 600 and white residual traces after polyethylene glycol-2000. |
| 3 | Solvent mixture of 50% ethanol, 45% water and 5% ethyl acetate | Mixed with reinforcement in equal volume | go deeper |
| 4 | n-propanol, isopropanol | Prepare a 10 % aqueous solution and mix in equal volume with the reinforcing agent. | works well |
| 5 | Propylene glycol block polyether | Prepare a 10 % aqueous solution and mix in equal volume with the reinforcing agent. | go deeper |
| 6 | diethylene glycol | Prepare a 10 % aqueous solution and mix in equal volume with the reinforcing agent. | go deeper |

**Table S6** Colour difference test of reinforcement

| NO. | L（D65） | a（D65） | b（D65） | Analogue Colour | ∆E2000 |
| --- | --- | --- | --- | --- | --- |
| 1 | pre-reinforcement：41.65 | 7.61 | 16.30 | 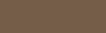 | 1.9 |
| after-reinforcement：39.64 | 8.25 | 17.03 | 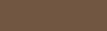 |
| 2 | pre-reinforcement：33.91 | 6.52 | 13.32 | 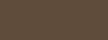 | 1.8 |
| after-reinforcement：36.06 | 6.64 | 13.54 | 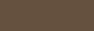 |
| 3 | pre-reinforcement：38.02 | 12.27 | 22.52 | 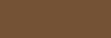 | 1.3 |
| after-reinforcement：38.77 | 11.27 | 20.53 | 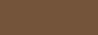 |
| 4 | pre-reinforcement：42.07 | 6.54 | 15.29 | 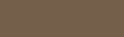 | 2.5 |
| after-reinforcement：39.65 | 7.67 | 17.07 | 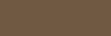 |

**Table S7** Test data on retention of reinforcement

| NO. | Mass before Reinforcement（g） | Quality after Consolidation（g） | Reinforcement Retention（%） |
| --- | --- | --- | --- |
| 1 | 0.387 | 0.394 | 1.8 |
| 2 | 0.400 | 0.409 | 2.2 |
| 3 | 0.439 | 0.450 | 2.5 |
| 4 | 0.339 | 0.349 | 2.9 |
| 5 | 0.541 | 0.557 | 2.9 |
